# Supplementary material for: A Risk Score Signature Consisting of Six Immune Genes Predicts Overall Survival in Patients with Lower-Grade Gliomas
Source: Hindawi journal article supplement (doi:10.1155/2022/2558548), 2022-02-11
Supplement: f1 [file 2558548.f1.pdf]

**Table S1. Venn diagram data**

Only GSE4-Only GSE1-Only ImmP-GSE4290-L-GSE4290-L-GSE12657-GSE4290-DEGs AND GSE12657-

|           |         |          |          |          |          |        |
|-----------|---------|----------|----------|----------|----------|--------|
| TOP2A     | CALB2   | AZGP1    | CACNG3   | PSMB8    | ANGPTL2  | PDYN   |
| LINC01088 | KALRN   | B2M      | SLC30A3  | EGFR     | CCL2     | CCK    |
| OLFM3     | PRSS3   | CALR     | TIMP4    | RXFP1    | RASGRP1  | SST    |
| GJB6      | CDS1    | CANX     | GABRA1   | NMB      | TNFRSF10 | F2R    |
| NDC80     | SLC6A15 | CD1A     | DDN      | CXCL14   | PENK     | RBP4   |
| CES4A     | PCDH8   | CD1B     | GABRA5   | CRH      | CD14     | VIP    |
| IRX3      | CNKS2   | CD1C     | WIF1     | FABP6    | KLRC3    | BMP2   |
| LFNG      | SNAP25  | CD1D     | SV2B     | MCHR2    | PPP3R1   | PCSK1  |
| MARVELL   | CADPS   | CD1E     | CPNE6    | CALCRL   | ISG20L2  | TAC1   |
| HES6      | CAMK1G  | CD4      | SOSTDC1  | MSTN     | PTHLH    | PRKCB  |
| CPXM1     | PSD     | CD8A     | ID3      | PAK6     | HMOX1    | PAK1   |
| LGI3      | DCLK1   | CD8B     | PDE1A    | PCSK2    | IL11RA   | BDNF   |
| UHRF1     | DGKB    | CD74     | SYNGR3   | CHGA     | PTK2B    | NPY    |
| CREG2     | TGFBI   | CREB1    | ITPKA    | SEMA4D   | PPP3CB   | PTGER3 |
| MAL2      | PPM1E   | CTSB     | RYR2     | ERAP2    | IL10RA   | PRKCG  |
| RAB3C     | CUX2    | CTSE     | ANO3     | HNF4G    | PNOC     | FGF13  |
| LCAT      | SPTBN2  | CTSL     | SYN2     | TNC      | NEDD4    | PAK3   |
| PNMAL2    | GNAO1   | CTSS     | MTHFD2   | GREM1    | C3AR1    | VIPR1  |
| ANKRD34   | PPFIA3  | FCER1G   | HTR2C    | TSHR     | MAP2K1   |        |
| SYNPR     | NEURL1  | PDIA3    | HPCA     | SEMA3E   | TNFRSF1B |        |
| NEUROD6   | CACNB1  | HFE      | KCNJ4    | SSTR1    | MAPK1    |        |
| RP11-320H | FAM65B  | HLA-A    | GRM3     | RORB     | BMP7     |        |
| GABRB2    | MOXD1   | HLA-B    | RGS4     | FABP3    | CDK4     |        |
| TRHDE     | PCP4    | HLA-C    | NELL1    | IL12RB2  | TNFRSF21 |        |
| MELK      | AAK1    | HLA-DMA  | PCLO     | IL7      | S100A9   |        |
| BCAN      | UST     | HLA-DMB  | SOX4     | MCHR1    | HLA-F    |        |
| KIRREL3   | ADCY2   | HLA-DOA  | SLC8A2   | TNFRSF19 | TYROBP   |        |
| AK5       | BRSK2   | HLA-DOB  | SLC4A3   | THRB     | FCGRT    |        |
| GPR22     | CEP170B | HLA-DPA1 | SLC17A7  | MDK      | CBLB     |        |
| NPY1R     | DLG4    | HLA-DPB1 | CRYM     | ADRB1    | PLXNB2   |        |
| GLT1D1    | PIP5K1B | HLA-DQA  | NEFM     |          | CSF2RA   |        |
| OGDHL     | LRRC8B  | HLA-DQA  | RFPL1S   |          | GRB2     |        |
| CBLN4     | MEF2C   | HLA-DQB1 | SNCG     |          |          |        |
| TLL2      | CPVL    | HLA-DRA  | NEFL     |          |          |        |
| FAM19A1   | ECM2    | HLA-DRB1 | GRIN2A   |          |          |        |
| PACSIN1   | ATP2B2  | HLA-DRB3 | SULT4A1  |          |          |        |
| C3orf80   | HCN2    | HLA-DRB4 | SLC12A5  |          |          |        |
| GALNTL5   | DAAM1   | HLA-DRB5 | NPTX1    |          |          |        |
| HCN1      | COL4A1  | HLA-E    | NRGN     |          |          |        |
| GDA       | AP1S1   | HLA-G    | GABRG2   |          |          |        |
| PBK       | NKX2-2  | HLA-H    | ATP8A2   |          |          |        |
| C11orf87  | OLFM1   | MR1      | ERC2     |          |          |        |
| SERTM1    | PSMB9   | HSPA1A   | SERPINI1 |          |          |        |
| LINC00507 | AQP3    | HSPA1B   | MICAL2   |          |          |        |

|                |          |          |          |
|----------------|----------|----------|----------|
| RSPO2          | FAM131A  | HSPA1L   | LPL      |
| DRD1           | RND2     | HSPA2    | RIMBP2   |
| C1orf115       | CDH13    | HSPA4    | WNT10B   |
| RAPGEFLIPTPRT  |          | HSPA5    | SYT1     |
| SMPX           | SLN      | HSPA6    | ICAM5    |
| ERICH3         | CAMK1    | HSPA8    | CAMK2B   |
| EIF4EBP1       | STXBP1   | HSP90AA1 | STX1A    |
| SOX11          | MAPK8IP2 | HSP90AB1 | ST18     |
| PCDHGA8        | GAD1     | ICAM1    | CAMK2A   |
| MAP7D2         | MMD      | IFNA1    | NPTX2    |
| TMEM100        | BAIAP2   | IFNA2    | GABRA2   |
| OPALIN         | CDKL5    | IFNA4    | STMN2    |
| TMEM235        | UCHL1    | IFNA5    | PHYHIP   |
| NECAB1         | RAP1GAP  | IFNA6    | DLG2     |
| DLGAP3         | PRKAR2B  | IFNA7    | VSNL1    |
| NES            | CACNB3   | IFNA8    | CA11     |
| RP11-332HPDE1B |          | IFNA10   | KIAA0319 |
| ATP2B3         | CACNB2   | IFNA13   | PARM1    |
| HHIP           | FAM49A   | IFNA14   | NPTXR    |
| TMEM191        | WDR47    | IFNA16   | SNCB     |
| NWD2           | SKAP2    | IFNA17   | MYT1L    |
| RTBDN          | PLD3     | IFNA21   | TRAF3IP2 |
| CALY           | PRSS2    | IFNG     | RCAN2    |
| ATOH7          | DNM3     | KIR2DL1  | CCKBR    |
| CHRM3          | CDK5R1   | KIR2DL2  | MYC      |
| MFSD4          | ATP1B1   | KIR2DL3  | ETV1     |
| C1QTNF4        | MCM7     | KIR2DL4  | PPL      |
| GLS2           | TP53I3   | KIR2DS1  | KCNJ3    |
| RAP1GAP2       | IDS      | KIR2DS3  | PTPN20B  |
| CDKL2          | REV3L    | KIR2DS4  | GRM1     |
| CYP4X1         | MMP16    | KIR2DS5  | PLK2     |
| CHRM1          | EIF4E    | KIR3DL1  | RAB3A    |
| SYTL5          | IDH3A    | KIR3DL2  | CDH12    |
| GBX2           | DYNLT1   | KLRC1    | ASCL1    |
| SNCA           | KDM5A    | KLRC2    | CAP2     |
| PTPN5          | RFK      | KLRD1    | SH3GL3   |
| FLJ16779       | NUP98    | LTA      | NECAB2   |
| DLL3           | CTSO     | CIITA    | FAM189A1 |
| SLC26A4        | EFNB3    | MICA     | MAL      |
| RBFOX1         | PAIP1    | MICB     | KIAA1107 |
| SYT13          | DPY19L2P | NFYA     | RIMS3    |
| AKAP5          | GAS7     | NFYB     | KIAA0513 |
| RP1-212P9      | PRPS2    | NFYC     | TBR1     |
| LRRC7          | OPA1     | LGMN     | ENC1     |
| RHBDL1         | OLIG2    | PSMC1    | DNM1     |
| TTC9B          | SRD5A1   | PSMC2    | MAST3    |

|            |          |         |          |
|------------|----------|---------|----------|
| CHST9      | C1orf95  | PSMC3   | CRHBP    |
| RBFOX3     | CPNE1    | PSMC4   | KCNK1    |
| HOOK1      | BARD1    | PSMC5   | GLS      |
| PPP4R4     | CDK2     | PSMC6   | SPOCK3   |
| JAZF1-AS1  | SLC12A4  | PSMD1   | GRIN1    |
| DLX1       | RAB13    | PSMD2   | EPHA5    |
| NKAIN2     | MOAP1    | PSMD3   | HTR2A    |
| EZH2       | ENO2     | PSMD4   | KIAA1045 |
| IRX1       | NUP188   | PSMD5   | DOC2A    |
| ADAMTS8    | CCND1    | PSMD7   | SCN2A    |
| NUDT14     | TUSC3    | PSMD8   | BCHE     |
| TMEM130    | VSIG4    | PSMD10  | HSPA12A  |
| GNG3       | AK2      | PSMD11  | BSN      |
| MIR7-3HG   | ASS1     | PSMD13  | DMTN     |
| SOWAHA     | LPGAT1   | PSME1   | NRXN3    |
| GPR37      | LYRM9    | PSME2   | MDFI     |
| S1PR5      | LILRB4   | RELB    | MYRIP    |
| TMEM151    | C1orf216 | RFX5    | CLCN4    |
| WNK2       | KLK7     | RFXAP   | SORBS2   |
| MYO1D      | ATP6V1H  | SLC10A2 | STON1    |
| CLEC4G     | HMHA1    | TAP1    | KCNAB2   |
| KRT222     | SYNJ1    | TAP2    | CABP1    |
| ASIC2      | MAST1    | TAPBP   | NCDN     |
| KIF4A      | NEUROD2  | THBS1   | RAPGEF5  |
| TMEM155    | FBXL2    | SEM1    | PTPRR    |
| RASAL1     | NSG1     | KLRC4   | PRKCZ    |
| UNC13C     | SCAMP5   | AP3B1   | LPCAT4   |
| KCNJ9      | TP53I11  | RFXANK  | XK       |
| RP11-182J2 | THEMIS2  | PSMD6   | NEFH     |
| GPR83      | ARPP19   | PSME3   | KCNJ6    |
| SLC17A6    | TNR      | PSMD14  | NELL2    |
| ARX        | ABCB9    | CLEC4M  | LDB2     |
| RP11-389G  | HOMER1   | IFI30   | NID1     |
| MUM1L1     | GPR6     | PROCR   | PPFIA2   |
| MAK        | MAP3K10  | ADRM1   | RUNDC3A  |
| LOC28457   | CA4      | ECPAS   | RAB40B   |
| NAPB       | PNMA2    | TRPC4AP | ZNF536   |
| KIF20A     | LGALS3B  | CD209   | CHD5     |
| SYT4       | KIF3C    | UBXN1   | BCL11A   |
| PPP2R2C    | RASGRF1  | ERAP1   | HPRT1    |
| RASGEF1    | MAP2K4   | TAPBPL  | CDH18    |
| RASGRF2    | NEDD9    | KIR2DL5 | ALGI1    |
| CDH8       | MDC1     | ULBP3   | GAD2     |
| MAML2      | SHANK2   | ULBP2   | ZNF365   |
| FAM19A2    | ATP6V1B2 | ULBP1   | ADCY1    |
| RP11-710C  | NECAP1   | KIR3DL3 | RPH3A    |

|           |               |          |          |
|-----------|---------------|----------|----------|
| SYN1      | CAMTA2        | RAET1E   | GUCY1B3  |
| SNCAIP    | SRPX          | RAET1L   | PPM1H    |
| BEX5      | OXCT1         | UBR1     | TPPP     |
| PEX5L     | GABARAPRAET1G |          | NAV3     |
| CYP26B1   | TRIOBP        | PDIA2    | LPPR4    |
| ERMN      | ZNF204P       | HAMP     | SYP      |
| RTN4RL2   | SLC7A7        | PI3      | DYNC1I1  |
| TENM2     | TMEM246       | CAMP     | AMPH     |
| STXBP6    | PPP1R13B      | DEFB4A   | SLC2A3   |
| CEP55     | GPX7          | PPBP     | FRRS1L   |
| FERMT1    | MATK          | REG3G    | TTC9     |
| PPP1R16B  | RTN2          | CXCL16   | DOCK3    |
| ARHGAP4   | ARHGEF9       | SLPI     | DGKZ     |
| CRNDE     | PREPL         | CXCL8    | RIMS2    |
| SLC5A11   | AKAP13        | CXCL10   | LY6H     |
| ST6GALN2  | IDH1          | CXCL9    | SNAP91   |
| TUNAR     | DNMBP         | CXCL5    | CDKN2D   |
| RNF128    | CDK17         | CXCL11   | EPB41L1  |
| PALM2     | RAB31         | CXCL6    | TAGLN3   |
| HS3ST4    | LAPTM5        | CXCL1    | GPRASP1  |
| ZNF385B   | MSL3          | CXCL12   | KCNQ2    |
| NKAIN4    | RTN1          | CXCL13   | GOT1     |
| SVOP      | ZNF529        | CXCL2    | NEDD4L   |
| KIF17     | RECQL         | PF4      | LYPD1    |
| HPCAL4    | RUNDC3B       | XCL1     | YWHAH    |
| PCDHB11   | PDE4A         | CXCL3    | MAP3K9   |
| SHD       | KLF10         | DEFB103B | NIPAL3   |
| TLL7      | PCGF2         | CCL13    | EPHB6    |
| DNAJA4    | LIMK2         | CCL1     | APLP1    |
| CNTN2     | SLC4A7        | DEFB1    | ELAVL2   |
| CELF4     | SUCLA2        | CCL8     | PHLDA1   |
| RP11-215H | ATP6V1D       | ELANE    | RGS7     |
| HSPB3     | REEP1         | DEFB103A | PDE2A    |
| NGB       | VAMP2         | DEFA3    | ZBTB20   |
| BEND4     | ZNF804A       | DEFA1    | SYNGR1   |
| HIST1H4J  | TSPYL4        | TMSB10   | ARHGAP44 |
| SCN3B     | NDEL1         | DEFA6    | SYT5     |
| ST8SIA5   | MLLT11        | DEFA5    | SCN2B    |
| LOC38989  | CDK5          | DEFA4    | TCF12    |
| ZMAT4     | BTBD3         | LCN2     | PAK7     |
| DGKE      | PARVB         | LCN1     | CHN1     |
| VSTM2L    | PXDC1         | COLEC10  | PTPN3    |
| PRRX1     | PARK2         | BPI      | NNAT     |
| SLC35F3   | MPST          | S100A8   | SPINT2   |
| CLCA4     | BASP1         | DCD      | CACNA2D1 |
| DIRAS2    | C14orf2       | LCN6     | TUBA4A   |

|           |          |          |         |
|-----------|----------|----------|---------|
| RP11-469M | ATP6V1A  | S100A12  | PSD3    |
| SAMD12    | KIAA0368 | HTN3     | RAPGEF4 |
| FXYD7     | CLSTN3   | LCN8     | HNMT    |
| MYRF      | OGG1     | DEFA1B   | PTPRN   |
| AF131215  | AKR1C3   | CCR10    | APOC1   |
| SLC24A2   | PFKP     | CELA1    | PART1   |
| LOC72973  | SOX13    | DEFB106A | SPARC   |
| CTB-78F1  | NUDT1    | BPIFC    | PRKAR1B |
| CNTN4     | MPP2     | MMP12    | ATRNL1  |
| ZCCHC12   | HLF      | BPIFB6   | WDR7    |
| LOC40122  | PLCH1    | LEAP2    | RP2     |
| CARNS1    | TSPYL2   | SFTPD    | SH3BP5  |
| RIT2      | UBE2V2   | LCN9     |         |
| PCDHB9    | TXNIP    | BPIFB2   |         |
| EMX1      | CAMTA1   | PTGDS    |         |
| JAKMIP3   | APC2     | TMSB4X   |         |
| WSCD2     | ACOX1    | PGLYRP1  |         |
| FNDC9     | PALM     | ZC3HAV1  |         |
| PITPNM3   | CCDC93   | TMSB15A  |         |
| KLHL26    | SRPK2    | S100B    |         |
| CCDC80    | RASSF2   | S100A13  |         |
| PDE1C     | TBC1D9   | S100A6   |         |
| WEE1      | RGL2     | DEFB119  |         |
| UBE2QL1   | ADAM17   | DEFB107A |         |
| JPH1      | DMXL2    | DEFB105A |         |
| CTC-471C1 | ACOT7    | SERPIND1 |         |
| CPLX2     | NPTN     | DEFB129  |         |
| DLGAP2    | ZNF22    | DEFB127  |         |
| RAB3B     | ARL6IP1  | S100P    |         |
| FOXD1     | FKBP8    | S100A7   |         |
| CDH19     | SMARCD2  | DEFB104A |         |
| JAKMIP1   | SBF1     | DEFB126  |         |
| TFAP2A    | MAPRE3   | DEFB106B |         |
| TAS2R5    | KIF5A    | DEFB104B |         |
| LOC44093  | IQSEC3   | DEFB107B |         |
| KCNH3     | AJAP1    | PGLYRP3  |         |
| 44266     | LBR      | PGLYRP2  |         |
| CNGA3     | SLBP     | S100A10  |         |
| PGM2L1    | GHITM    | S100A2   |         |
| RP11-116O | MAPRE2   | DEFB125  |         |
| COL24A1   | AP3M2    | DEFB123  |         |
| CNDP1     | R3HDM1   | DEFB105B |         |
| SLC6A17   | KCND3    | DEFB132  |         |
| THEMIS    | ZCCHC24  | BPIFB3   |         |
| KCTD4     | MAPK9    | LCN12    |         |
| GRIN2B    | MCL1     | PGLYRP4  |         |

|           |         |          |
|-----------|---------|----------|
| SDR16C5   | NUPL1   | S100A11  |
| ITPR1     | DUSP3   | S100A5   |
| KIF18A    | TUBB2A  | S100A3   |
| FEZF2     | STX10   | S100A1   |
| TPPP3     | RNMT    | DEFB128  |
| SPSB4     | GNB5    | DEFB108B |
| BTBD17    | RAMP1   | HTN1     |
| ARHGDIG   | DLG5    | LMBR1L   |
| NCS1      | GULP1   | S100A7A  |
| LINC00889 | G3BP2   | DEFB118  |
| NEGR1     | NRXN1   | COLEC12  |
| UNC5D     | ANK2    | TMSB4Y   |
| WBSCR17   | UCKL1   | DEFB131A |
| VSTM2A    | DLGAP1  | DEFB134  |
| CACNA1B   | MMP17   | DEFB130A |
| FOXM1     | TOMM34  | DEFB124  |
| GRM2      | RALGPS1 | DEFB121  |
| GSX1      | GM2A    | DEFB116  |
| TSPAN12   | ZNF384  | DEFB115  |
| STK17B    | CDC25B  | DEFB114  |
| SLC7A14   | DSTYK   | DEFB113  |
| TRIM36    | NME4    | DEFB112  |
| GPR62     | UNC13A  | DEFB110  |
| SYNJ2     | AGAP2   | TMSB15B  |
| EFNA2     | KIF5C   | DEFB133  |
| LRFN2     | PHLPP2  | S100Z    |
| PRRG3     | FAAH    | MAVS     |
| SELE      | IGFBP4  | TMSB4XP8 |
| FOSB      | YIF1A   | S100A14  |
| MEX3A     | PPWD1   | LCN10    |
| TRIM59    | TBC1D30 | S100A16  |
| CPNE4     | RNF41   | DEFB136  |
| SMOC1     | QDPR    | DEFB135  |
| BHLHE22   | NAP1L3  | DEFB117  |
| ADAMTS1   | MED12   | ZC3HAV1L |
| PRR18     | TLN1    | S100A7L2 |
| FCGBP     | ATAD2B  | MBL3P    |
| LPAR1     | MAPK10  | DEFB4B   |
| VEPH1     | LZTS3   | BPIFB4   |
| RNF157-A  | NCKAP1L | IFNAR1   |
| SEC14L5   | SEC23A  | AZU1     |
| SLITRK4   | RNF11   | DEFB131B |
| CALB1     | PVRL2   | DEFA1A3  |
| CACNA2D   | SLC4A2  | LCN1P1   |
| MACROD2   | CLN3    | S100G    |
| ABCA1     | YWHAB   | DEFA7P   |

|              |         |          |
|--------------|---------|----------|
| EPHX4        | ANXA11  | DEFB130B |
| LOC28514     | PRNP    | DEFB108F |
| TSPAN11      | PAPOLA  | DEFB131C |
| DUSP2        | LARGE   | TCHHL1   |
| LINC00460    | PDLIM5  | TINAGL1  |
| ENPP2        | MAPK6   | IFNGR1   |
| LOC38983     | PTTG1IP | SLC22A17 |
| CPEB1        | CAPN2   | WFIKKN1  |
| SIX1         | DLX2    | WFDC2    |
| IPCEF1       | SERINC3 | IL6      |
| E2F8         | SSX2IP  | UMODL1   |
| HS6ST3       | TRIM2   | TGFB1    |
| SYT16        | APBB1   | PF4V1    |
| NTN1         | STK10   | MMP9     |
| CDKN2B       | SALL2   | ANOS1    |
| AF070581     | ELAVL4  | TLR4     |
| FKBP10       | CDK14   | SPAG11B  |
| CCDC167      | SLC27A2 | A2M      |
| GRM5         | SEPT8   | NFKB1    |
| PCTP         | GNAQ    | APOBEC3G |
| ANK3         | EFS     | NOD2     |
| LOC28617     | NUMA1   | MBL2     |
| CLDN10       | TRIM37  | SFTPA1   |
| FBXW7        |         | RBP1     |
| LOC100506731 |         | TLR2     |
| KIAA1211L    |         | SLC40A1  |
| EEF1A2       |         | PLAU     |
| ASIC4        |         | IL1B     |
| LINC00645    |         | PAEP     |
| NUAK1        |         | HJV      |
| C7orf57      |         | MUC5AC   |
| RIMS1        |         | OBP2A    |
| CDH9         |         | PLTP     |
| SLC26A4      |         | MX1      |
| COX7A1       |         | DDX58    |
| SIX4         |         | IFNL1    |
| TMEM132D     |         | IRF3     |
| PPFIA4       |         | SFTPA2   |
| RPRML        |         | LPA      |
| TUBB4A       |         | LBP      |
| HMGCLL1      |         | NOX4     |
| ZIC1         |         | LTF      |
| LRRC2        |         | IFNB1    |
| ADAMTS6      |         | RBP5     |
| OR2L13       |         | FABP7    |
| RALYL        |         | FABP5    |

|              |         |
|--------------|---------|
| CLEC2L       | FABP2   |
| LINC01279    | FABP4   |
| TMEM38A      | R3HDML  |
| CSRP2        | BPIFA3  |
| RBM24        | BPIFB1  |
| LOC100129973 | OASL    |
| COL26A1      | CRABP2  |
| NCEH1        | CRABP1  |
| CYP46A1      | RBP7    |
| VANGL2       | DUOX1   |
| STPG1        | OBP2B   |
| NUSAP1       | RBP2    |
| ENTPD3       | LCN15   |
| DDIT4        | CETP    |
| SLC32A1      | FABP12  |
| GABRA4       | FABP9   |
| EPB41L4B     | BPIFA1  |
| EPB41L3      | LCNL1   |
| NSUN7        | C8G     |
| PLEKHH3      | SPAG11A |
| STMN4        | PI15    |
| NINJ2        | NOX1    |
| BUB1         | PMP2    |
| TMEM56       | APOD    |
| AHNAK2       | ORM2    |
| DNAJC6       | ORM1    |
| HMX1         | TNF     |
| SOX6         | CTSG    |
| ASPA         | PRTN3   |
| MRAP2        | PML     |
| LINC00086    | AEN     |
| MCTP1        | CYBB    |
| BOK          | BPIFA2  |
| CLSTN2       | ISG20   |
| CHN2         | BCL3    |
| LINC00836    | NOX5    |
| TSPYL5       | NOX3    |
| FRMPD4       | DUOX2   |
| DLGAP5       | TLR3    |
| BEST3        | TFRC    |
| NT5DC2       | IFIH1   |
| CYP26A1      | LRP1    |
| PPP1R14A     | TRIM5   |
| KCNA4        | IDO1    |
| ST8SIA3      | GDF15   |
| PRO1082      | ADIPOQ  |

|              |          |
|--------------|----------|
| ELOVL4       | STAT3    |
| LINGO2       | STAT1    |
| DOK6         | IFNL2    |
| NGEF         | SOCS3    |
| SELL         | SEMG1    |
| KCNQ5        | TNFSF10  |
| RYR3         | CCL20    |
| ABCA5        | SOCS1    |
| SLITRK1      | RNASEL   |
| RP4-593C16.3 | IRF1     |
| GALNT14      | IL15     |
| SRCIN1       | APOBEC3F |
| C1orf192     | PLAAT4   |
| FKBP1B       | CHIT1    |
| DCTN1-AS1    | CD40     |
| P2RX5        | TLR7     |
| SYTL4        | PPIA     |
| RP3-406A7.7  | ZYX      |
| NDFIP2       | NLRX1    |
| RTN4RL1      | PGC      |
| NUF2         | VEGFA    |
| UNC5A        | IKBKE    |
| RERG         | ISG15    |
| ID4          | DHX58    |
| NPAS1        | TNFAIP3  |
| F5           | TFR2     |
| 44259        | FCN2     |
| PPP1R14B     | MUC4     |
| PRKX         | ELN      |
| LHFPL3       | IL27     |
| FAM110C      | MAPT     |
| LOC101927988 | LYZ      |
| CPLX1        | CCL5     |
| LNX1         | LEP      |
| L1CAM        | CYLD     |
| REPS2        | KLKB1    |
| ADRA1B       | CST4     |
| SH2D5        | CSRP1    |
| STXBP5       | MAPK14   |
| HOXA10       | JUN      |
| BOC          | ITGAV    |
| MAG          | IRF5     |
| RAB27B       | CCR6     |
| LRTM2        | IL12B    |
| PCDHGA10     | TLR8     |
| STYK1        | GNLY     |

|              |          |
|--------------|----------|
| FANCE        | CD81     |
| TSPAN6       | EIF2AK2  |
| LMNB1        | APOM     |
| CRISPLD1     | CACYBP   |
| CCDC3        | NOD1     |
| ACTR3C       | MAPK8    |
| FHL2         | MAPK3    |
| YJEFN3       | BST2     |
| CCDC68       | BPHL     |
| KIAA1324     | PLA2G2A  |
| KCNAB1       | GRN      |
| OPCML        | NEWENTRY |
| PCP4L1       | PDGFRA   |
| TNIP3        | GNAI1    |
| CDK5R2       | WNT5A    |
| CLMN         | FURIN    |
| CBR1         | ADAR     |
| MCM5         | TYK2     |
| NIPAL2       | NOS2     |
| CAMK4        | TRAF3    |
| CELF5        | TPT1     |
| C1QL1        | TPM2     |
| CKAP2L       | NEO1     |
| PRKCD        | AHNAK    |
| PLLP         | TLR1     |
| CHAC1        | TK2      |
| TMEM200A     | PRDX2    |
| ZNF560       | MX2      |
| EXTL1        | FGF2     |
| LOC100506563 | FGA      |
| FAM84B       | TCF7L2   |
| SLC22A15     | F2RL1    |
| MEG3         | TKFC     |
| BDKRB2       | MSR1     |
| KIAA1598     | NFKBIZ   |
| LINC00320    | LMBR1    |
| ADAMTS19     | EPPIN    |
| PPP1R14C     | SRC      |
| TNNT1        | MPO      |
| ANKFN1       | ELAVL1   |
| SRRM4        | ROBO3    |
| PPP1R1B      | SP1      |
| NCOA7        | SOD1     |
| SULF2        | PDF      |
| FRAS1        | DLL4     |
| MSI1         | ECD      |

|              |           |
|--------------|-----------|
| KCNQ3        | SLC11A1   |
| LOC100287387 | DMBT1     |
| SV2C         | STING1    |
| FSTL5        | SKIV2L    |
| LOC100131170 | SEMG2     |
| SNX10        | DES       |
| TMEM125      | DCK       |
| CAMKV        | DAXX      |
| GALR1        | TNFRSF10A |
| KIAA1661     | EED       |
| KCTD16       | CCL4      |
| LRP2         | LIMS1     |
| GOLGA7B      | LALBA     |
| PPEF1        | APOBEC3H  |
| NOTCH2NL     | TMPRSS6   |
| B3GALT2      | SPINK5    |
| VWA1         | MARCO     |
| LINC00301    | BECN1     |
| HMCN1        | TNFSF11   |
| KIAA1644     | KNG1      |
| CENPK        | CSK       |
| VCAN         | KLRK1     |
| STK32A       | KCNH2     |
| CRB1         | JUND      |
| CNTNAP2      | JAK1      |
| LOC100505912 | CLDN4     |
| MAFG-AS1     | CCL28     |
| STX1B        | RNASE3    |
| POFUT1       | RN7SL1    |
| ATL1         | IRF7      |
| LOC101927811 | IREB2     |
| HEY1         | ILK       |
| LOC286367    | IL18      |
| ANO4         | IL17A     |
| LRFN5        | LTB4R     |
| DOCK9        | APOBEC3A  |
| FOLH1B       | MASP2     |
| SLC39A12     | TRIM27    |
| GABRD        | RELA      |
| PCDHAC2      | IL7R      |
| NAP1L2       | IL1A      |
| MAGEE1       | PTX3      |
| SEPT4        | IFNAR2    |
| TP53         | IFN1@     |
| CCDC85A      | SYTL1     |
| TSTD1        | APOBEC3C  |

|              |         |
|--------------|---------|
| JPH3         | DDX17   |
| UNC5C        | PTGS2   |
| ADAM11       | HTR1A   |
| RBM11        | SEPTIN7 |
| GCK          | CD40LG  |
| COL9A3       | MASP1   |
| NOMO3        | PROC    |
| NEU4         | MAP2K2  |
| CNTN3        | HRG     |
| SH3GL2       | NDRG1   |
| SOX2         | IRF9    |
| RPE65        | TRIM22  |
| SOX10        | LANCL1  |
| ANTXR1       | PPP4C   |
| SYNPO        | HMGB1   |
| SGPP2        | RNASE7  |
| ANKRD18A     | ABCC4   |
| APBA1        | HGF     |
| EGFEM1P      | HDAC1   |
| LOC100128079 | IFNLR1  |
| TYRP1        | PLSCR1  |
| GNAL         | BACH2   |
| PNMA6A       | TANK    |
| KIAA0101     | PIK3CG  |
| WDR49        | ARRB1   |
| RNF213       | RSAD2   |
| CLEC5A       | STAB2   |
| KCNIP4       | TBK1    |
| DACH2        | PDGFRB  |
| BRSK1        | PDCD1   |
| LRRC75A      | ARG2    |
| TLN2         | AQP9    |
| BFSP1        | FASLG   |
| FAM71E1      | APOH    |
| LOC285556    | BIRC5   |
| KLHL2        | ANXA6   |
| LOC100132891 | IL22    |
| GLRA2        | VTN     |
| MEGF11       | VIM     |
| DYNLT3       | VCAM1   |
| LOC285812    | PRDX1   |
| LPPR5        | GFAP    |
| PLEKHA1      | GBP2    |
| NIPAL4       | ALB     |
| ATOH8        | SLC29A3 |
| TSKU         | OAS1    |

KCNA1  
KLF8  
HAR1A  
KLK6  
SALL3  
HS3ST2  
DLL1  
EPHA4  
DTNB  
KLF16

AGER  
UNC93B1  
TNFSF4  
NOS1  
ACTG1  
ACTA1  
ACO1  
SERPINA3  
CXCR1  
CCL15  
CCL14  
CCL16  
CCL19  
CCL18  
CCL17  
CCL26  
CCL22  
CCR3  
CCL4L1  
ACKR2  
CCR7  
CCL27  
CCR8  
ACKR4  
CCL21  
CCL7  
CCL3  
CCL11  
CCR5  
CCL23  
CCL25  
CCL3L3  
CCL4L2  
CCL3L1  
CCR1  
CCL24  
XCL2  
CXCR4  
CXCR6  
CCR4  
TAF A5  
TAF A3  
TAF A4  
TAF A1  
TAF A2  
CCL15-CCL14

IL4  
CDH1  
LTBP1  
IL13  
IL10  
IL2  
PPARG  
FGR  
MIF  
CRP  
JAK2  
PTK2  
PTGDR  
CD86  
HCK  
VDR  
OLR1  
GRK2  
TXK  
RNASE2  
CD79A  
CD79B  
LYN  
SYK  
BTK  
BLNK  
VAV3  
VAV1  
VAV2  
RAC1  
RAC2  
RAC3  
PPP3CA  
PPP3CC  
CHP1  
PPP3R2  
CHP2  
NFAT5  
NFATC1  
NFATC2  
NFATC3  
NFATC4  
HRAS  
KRAS  
NRAS  
FOS

CARD11  
BCL10  
MALT1  
CHUK  
IKBKB  
IKBKG  
NFKBIA  
NFKBIB  
NFKBIE  
CD19  
CR2  
PIK3R5  
PIK3R1  
PIK3R2  
PIK3R3  
PIK3CA  
PIK3CB  
PIK3CD  
AKT3  
AKT1  
AKT2  
GSK3B  
INPP5D  
CD22  
CD72  
PTPN6  
LILRB3  
FCGR2B  
RASGRP3  
PLCG2  
IFITM1  
IGH  
IGHA1  
IGHA2  
IGHD  
IGHD1-1  
IGHD1-14  
IGHD1-20  
IGHD1-26  
IGHD1-7  
IGHD2-15  
IGHD2-2  
IGHD2-21  
IGHD2-8  
IGHD3-10  
IGHD3-16

IGHD3-22  
IGHD3-3  
IGHD3-9  
IGHD4-11  
IGHD4-17  
IGHD4-23  
IGHD4-4  
IGHD5-12  
IGHD5-18  
IGHD5-24  
IGHD5-5  
IGHD6-13  
IGHD6-19  
IGHD6-25  
IGHD6-6  
IGHD7-27  
IGHE  
IGHG1  
IGHG2  
IGHG3  
IGHG4  
IGHJ1  
IGHJ2  
IGHJ3  
IGHJ4  
IGHJ5  
IGHJ6  
IGHM  
IGHV1-18  
IGHV1-2  
IGHV1-24  
IGHV1-3  
IGHV1-45  
IGHV1-46  
IGHV1-58  
IGHV1-69  
IGHV1-8  
IGHV1-38-4  
IGHV1-69-2  
IGHV2-26  
IGHV2-5  
IGHV2-70  
IGHV3-11  
IGHV3-13  
IGHV3-15  
IGHV3-16

IGHV3-20  
IGHV3-21  
IGHV3-23  
IGHV3-30  
IGHV3-30-3  
IGHV3-30-5  
IGHV3-33  
IGHV3-35  
IGHV3-38  
IGHV3-43  
IGHV3-48  
IGHV3-49  
IGHV3-53  
IGHV3-64  
IGHV3-66  
IGHV3-7  
IGHV3-72  
IGHV3-73  
IGHV3-74  
IGHV3-9  
IGHV3-38-3  
IGHV3-69-1  
IGHV4-28  
IGHV4-30-1  
IGHV4-30-2  
IGHV4-30-4  
IGHV4-31  
IGHV4-34  
IGHV4-39  
IGHV4-4  
IGHV4-59  
IGHV4-61  
IGHV4-38-2  
IGHV5-51  
IGHV5-10-1  
IGHV6-1  
IGHV7-4-1  
IGHV7-81  
IGK  
IGKC  
IGKDEL  
IGKJ  
IGKJ1  
IGKJ2  
IGKJ3  
IGKJ4

IGKJ5  
IGKV@  
IGKV1-12  
IGKV1-13  
IGKV1-16  
IGKV1-17  
IGKV1-27  
IGKV1-33  
IGKV1-37  
IGKV1-39  
IGKV1-5  
IGKV1-6  
IGKV1-8  
IGKV1-9  
IGKV1D-12  
IGKV1D-13  
IGKV1D-16  
IGKV1D-17  
IGKV1D-33  
IGKV1D-37  
IGKV1D-39  
IGKV1D-42  
IGKV1D-43  
IGKV1D-8  
IGKV2-24  
IGKV2-28  
IGKV2-30  
IGKV2-40  
IGKV2D-24  
IGKV2D-28  
IGKV2D-29  
IGKV2D-30  
IGKV2D-40  
IGKV3-11  
IGKV3-15  
IGKV3-20  
IGKV3-7  
IGKV3D-11  
IGKV3D-15  
IGKV3D-20  
IGKV3D-7  
IGKV4-1  
IGKV5-2  
IGKV6-21  
IGKV6D-21  
IGKV6D-41

IGL  
IGLC1  
IGLC2  
IGLC3  
IGLC6  
IGLC7  
IGLJ  
IGLJ1  
IGLJ2  
IGLJ3  
IGLJ4  
IGLJ5  
IGLJ6  
IGLJ7  
IGLV@  
IGLV1-36  
IGLV1-40  
IGLV1-44  
IGLV1-47  
IGLV1-50  
IGLV1-51  
IGLV10-54  
IGLV11-55  
IGLV2-11  
IGLV2-14  
IGLV2-18  
IGLV2-23  
IGLV2-33  
IGLV2-8  
IGLV3-1  
IGLV3-10  
IGLV3-12  
IGLV3-16  
IGLV3-19  
IGLV3-21  
IGLV3-22  
IGLV3-25  
IGLV3-27  
IGLV3-32  
IGLV3-9  
IGLV4-3  
IGLV4-60  
IGLV4-69  
IGLV5-37  
IGLV5-39  
IGLV5-45

IGLV5-48  
IGLV5-52  
IGLV6-57  
IGLV7-43  
IGLV7-46  
IGLV8-61  
IGLV9-49  
C3  
C5  
CCL3P1  
CKLF  
CMA1  
CX3CL1  
CXCL17  
CCN1  
EDN1  
EDN2  
EDN3  
FGF10  
LECT2  
PPBPP1  
PROK2  
SAA1  
SAA2  
SBDS  
SEMA3A  
SEMA3B  
SEMA3C  
SEMA3D  
SEMA3F  
SEMA3G  
SEMA4A  
SEMA4B  
SEMA4C  
SEMA4F  
SEMA4G  
SEMA5A  
SEMA5B  
SEMA6A  
SEMA6B  
SEMA6C  
SEMA6D  
SEMA7A  
SLIT1  
SLIT2  
TYMP

C5AR1  
CCR9  
CCRL2  
CMKLR1  
CX3CR1  
CXCR3  
CXCR5  
ACKR3  
CYSLTR1  
CYSLTR2  
ACKR1  
EDNRA  
EDNRB  
FPR1  
FPR2  
GPR17  
GPR32  
GPR33  
PTGDR2  
C5AR2  
CXCR2  
LTB4R2  
PLAUR  
PLXNA1  
PLXNA2  
PLXNA3  
PLXNA4  
PLXNB1  
PLXNB3  
PLXNC1  
PLXND1  
PTAFR  
ROBO1  
ROBO2  
RXFP3  
XCR1  
ADM  
ADM2  
AGRP  
AGT  
AMBN  
AMELX  
AMH  
ANGPTL5  
ANGPTL7  
APLN

AREG  
MANF  
CDNF  
ARTN  
AVP  
BMP1  
BMP10  
BMP15  
BMP3  
BMP4  
BMP5  
BMP6  
BMP8A  
BMP8B  
BTC  
MYDGF  
CALCA  
CALCB  
CAT  
CD320  
CD70  
ADA2  
CER1  
CGA  
CGB3  
CGB1  
CGB2  
CGB5  
CGB7  
CGB8  
CHGB  
CLCF1  
CLEC11A  
CMTM1  
CMTM2  
CMTM3  
CMTM4  
CMTM5  
CMTM6  
CMTM7  
CMTM8  
CNTF  
CORT  
CSF1  
CSF2  
CSF3

CSH1  
CSH2  
CSHL1  
CSPG5  
CTF1  
CCN2  
DKK1  
EBI3  
EGF  
EPGN  
EPO  
EREG  
ESM1  
FAM3B  
FAM3C  
FAM3D  
FGF1  
FGF11  
FGF12  
FGF14  
FGF16  
FGF17  
FGF18  
FGF19  
FGF20  
FGF21  
FGF22  
FGF23  
FGF3  
FGF4  
FGF5  
FGF6  
FGF7  
FGF8  
FGF9  
VEGFD  
FIGNL2  
FLT3LG  
FSHB  
GAL  
GALP  
GAST  
GCG  
GDF1  
GDF10  
GDF11

GDF2  
GDF3  
GDF5  
GDF6  
GDF7  
GDF9  
GDNF  
GH1  
GH2  
GHRH  
GHRL  
GIP  
GKN1  
GMFB  
GMFG  
GNRH1  
GNRH2  
GPHA2  
GPHB5  
GPI  
GREM2  
GRP  
GUCA2A  
HBEGF  
HDGF  
HDGFL3  
IAPP  
IFNE  
IFNK  
IFNW1  
IGF1  
IGF2  
IL11  
IL12A  
IL16  
IL17B  
IL17C  
IL17D  
IL17F  
IL19  
IL1F10  
IL36RN  
IL36A  
IL37  
IL36B  
IL36G

IL1RN  
IL20  
IL21  
IL23A  
IL24  
IL25  
IL26  
IFNL3  
IL3  
IL31  
IL32  
IL33  
IL34  
IL5  
IL6ST  
IL9  
INHA  
INHBA  
INHBB  
INHBC  
INHBE  
INS  
INS-IGF2  
INSL3  
INSL4  
INSL5  
INSL6  
JAG1  
JAG2  
FGF7P6  
FGF7P3  
KITLG  
KL  
LACRT  
LEFTY1  
LEFTY2  
LHB  
LIF  
LRSAM1  
LTB  
LTBP2  
LTBP3  
LTBP4  
MIA  
MLN  
NAMPT

NDP  
NENF  
NGF  
NODAL  
CCN3  
NPF  
NPPA  
NPPB  
NPPC  
NRG1  
NRG2  
NRG3  
NRG4  
NRTN  
NTF3  
NTF4  
NTS  
NUDT6  
OGN  
OSGIN1  
OSM  
OSTN  
OXT  
ENDOU  
PDGFA  
PDGFB  
PDGFC  
PDGFD  
PDGFRL  
PGF  
PMCH  
POMC  
PPBPP2  
PPY  
PRL  
PRLH  
PROK1  
PSPN  
PTH  
PTH2  
PTN  
PYY  
QRF  
RABEP1  
RABEP2  
REG1A

RETN  
RETNLB  
RLN1  
RLN2  
RLN3  
SCG2  
SCGB3A1  
SCT  
AIMP1  
SECTM1  
SLURP1  
SPP1  
STC1  
STC2  
TDGF1  
TDGF1P3  
TG  
TGFA  
TGFB2  
TGFB3  
THPO  
TNFRSF11B  
TNFSF12  
TNFSF13  
TNFSF13B  
TNFSF14  
TNFSF15  
TNFSF18  
TNFSF8  
TNFSF9  
TOR2A  
TRH  
TSHB  
TSLP  
TXLNA  
UCN  
UCN2  
UCN3  
UTS2  
UTS2B  
VEGFB  
VEGFC  
VGF  
ACVR1B  
ACVR1C  
ACVR2A

ACVR2B  
ACVRL1  
ADCYAP1R1  
ADIPOR1  
ADIPOR2  
ADRB2  
AGTR1  
AGTR2  
AMHR2  
ANGPT1  
ANGPT4  
ANGPTL1  
ANGPTL3  
ANGPTL4  
ANGPTL6  
APLNR  
AR  
AVPR1A  
AVPR1B  
AVPR2  
BMPR1A  
BMPR1B  
BMPR2  
BRD8  
CALCR  
CNTFR  
CRHR1  
CRHR2  
CRIM1  
CRLF1  
CRLF2  
CRLF3  
CSF1R  
CSF2RB  
CSF3R  
ENG  
EPOR  
ESR1  
ESR2  
ESRRA  
ESRRB  
ESRRG  
FGFR1  
FGFR2  
FGFR3  
FGFR4

FGFRL1  
FLT1  
FLT3  
FLT4  
FSHR  
GALR2  
GALR3  
GCGR  
GHR  
GHRHR  
GHSR  
GIPR  
GLP1R  
GLP2R  
GNRHR  
GPER1  
HNF4A  
HTR3A  
HTR3B  
HTR3C  
HTR3D  
HTR3E  
IFNGR2  
IGF1R  
IGF2R  
IL10RB  
IL12RB1  
IL13RA1  
IL13RA2  
IL15RA  
IL2RB  
IL17RA  
IL17RB  
IL17RC  
IL17RD  
IL17RE  
IL18R1  
IL18RAP  
IL1R1  
IL1R2  
IL1RAP  
IL1RL1  
IL1RL2  
IL20RA  
IL20RB  
IL21R

IL22RA1  
IL22RA2  
IL23R  
IL27RA  
IL2RA  
IL2RG  
IL31RA  
IL3RA  
IL4R  
IL5RA  
IL6R  
IL9R  
INSR  
KDR  
LEPR  
LGR4  
LGR5  
LGR6  
LHCGR  
LIFR  
LTBR  
MC1R  
MC2R  
MC3R  
MC4R  
MET  
MLNR  
MPL  
MTNR1A  
MTNR1B  
NGFR  
NMBR  
NPR1  
NPR3  
NR0B1  
NR0B2  
NR1D1  
NR1D2  
NR1H2  
NR1H3  
NR1H4  
NR1I2  
NR1I3  
NR2C1  
NR2C2  
NR2E1

NR2E3  
NR2F1  
NR2F2  
NR2F6  
NR3C1  
NR3C2  
NR4A1  
NR4A2  
NR4A3  
NR5A1  
NR5A2  
NR6A1  
NRP1  
NRP2  
OGFR  
OPRD1  
OPRK1  
OPRL1  
OPRM1  
OSMR  
OXTR  
PGR  
PGRMC2  
PPARA  
PPARD  
PRLHR  
PRLR  
PTGER1  
PTGER2  
PTGER4  
PTGFR  
PTH1R  
PTH2R  
RARA  
RARB  
RARG  
RORA  
RORC  
RXFP2  
RXRA  
RXRB  
RXRG  
S1PR1  
S1PR2  
SCTR  
SDC1

SDC2  
SDC3  
SDC4  
SORT1  
SSTR2  
SSTR5  
ST2  
TACR1  
TEK  
TGFB1  
TGFB2  
TGFB3  
THRA  
TIE1  
TNFRSF10C  
TNFRSF10D  
TNFRSF11A  
TNFRSF12A  
TNFRSF13B  
TNFRSF13C  
TNFRSF14  
TNFRSF17  
TNFRSF18  
TNFRSF1A  
TNFRSF25  
TNFRSF4  
TNFRSF6B  
TNFRSF8  
TNFRSF9  
TRHR  
TUBB3  
VIPR2  
PTPN11  
ICAM2  
ITGAL  
ITGB2  
NCR2  
LCK  
FCGR3A  
FCGR3B  
NCR1  
NCR3  
CD247  
ZAP70  
LCP2  
LAT

PLCG1  
SH3BP2  
FYN  
SHC2  
SHC4  
SHC3  
SHC1  
SOS1  
SOS2  
ARAF  
BRAF  
RAF1  
HCST  
CD48  
CD244  
PRKCA  
SH2D1B  
SH2D1A  
FAS  
GZMB  
PRF1  
CASP3  
BID  
CD3D  
CD3E  
CD3G  
PTPRC  
ITK  
TEC  
NCK1  
NCK2  
GRAP2  
PAK2  
PAK4  
PAK5  
RHOA  
CDC42  
CD28  
ICOS  
MAP3K8  
MAP3K14  
CTLA4  
CBLC  
CBL  
PDK1  
PRKCQ

TRAC  
TRAJ1  
TRAJ2  
TRAJ3  
TRAJ4  
TRAJ5  
TRAJ6  
TRAJ7  
TRAJ8  
TRAJ9  
TRAJ10  
TRAJ11  
TRAJ12  
TRAJ13  
TRAJ14  
TRAJ15  
TRAJ16  
TRAJ17  
TRAJ18  
TRAJ19  
TRAJ20  
TRAJ21  
TRAJ22  
TRAJ23  
TRAJ24  
TRAJ25  
TRAJ26  
TRAJ27  
TRAJ28  
TRAJ29  
TRAJ30  
TRAJ31  
TRAJ32  
TRAJ33  
TRAJ34  
TRAJ35  
TRAJ36  
TRAJ37  
TRAJ38  
TRAJ39  
TRAJ40  
TRAJ41  
TRAJ42  
TRAJ43  
TRAJ44  
TRAJ45

TRAJ46  
TRAJ47  
TRAJ48  
TRAJ49  
TRAJ50  
TRAJ52  
TRAJ53  
TRAJ54  
TRAJ56  
TRAJ57  
TRAJ58  
TRAJ59  
TRAJ61  
TRAV1-1  
TRAV1-2  
TRAV2  
TRAV3  
TRAV4  
TRAV5  
TRAV7  
TRAV8-1  
TRAV8-2  
TRAV8-3  
TRAV8-4  
TRAV8-6  
TRAV8-7  
TRAV9-1  
TRAV9-2  
TRAV10  
TRAV12-1  
TRAV12-2  
TRAV12-3  
TRAV13-1  
TRAV13-2  
TRAV14DV4  
TRAV16  
TRAV17  
TRAV18  
TRAV19  
TRAV20  
TRAV21  
TRAV22  
TRAV23DV6  
TRAV24  
TRAV25  
TRAV26-1

TRAV26-2  
TRAV27  
TRAV29DV5  
TRAV30  
TRAV34  
TRAV35  
TRAV36DV7  
TRAV38-1  
TRAV38-2DV8  
TRAV39  
TRAV40  
TRAV41  
TRBC1  
TRBC2  
TRBD1  
TRBD2  
TRBJ1-1  
TRBJ1-2  
TRBJ1-3  
TRBJ1-4  
TRBJ1-5  
TRBJ1-6  
TRBJ2-1  
TRBJ2-2  
TRBJ2-3  
TRBJ2-4  
TRBJ2-5  
TRBJ2-6  
TRBJ2-7  
TRBV2  
TRBV3-1  
TRBV4-1  
TRBV4-2  
TRBV4-3  
TRBV5-1  
TRBV5-4  
TRBV5-5  
TRBV5-6  
TRBV5-7  
TRBV5-8  
TRBV6-1  
TRBV6-2  
TRBV6-3  
TRBV6-4  
TRBV6-5  
TRBV6-6

TRBV6-7  
TRBV6-8  
TRBV6-9  
TRBV7-2  
TRBV7-3  
TRBV7-4  
TRBV7-6  
TRBV7-7  
TRBV7-8  
TRBV7-9  
TRBV9  
TRBV10-1  
TRBV10-2  
TRBV10-3  
TRBV11-1  
TRBV11-2  
TRBV11-3  
TRBV12-3  
TRBV12-4  
TRBV12-5  
TRBV13  
TRBV14  
TRBV15  
TRBV16  
TRBV17  
TRBV18  
TRBV19  
TRBV20-1  
TRBV24-1  
TRBV25-1  
TRBV27  
TRBV28  
TRBV29-1  
TRBV30  
TRDC  
TRDD1  
TRDD2  
TRDD3  
TRDJ1  
TRDJ2  
TRDJ3  
TRDJ4  
TRDV1  
TRDV2  
TRDV3  
TRGV9

TRGV8  
TRGV5  
TRGV4  
TRGV3  
TRGV2  
TRGJP2  
TRGJP1  
TRGJP  
TRGJ2  
TRGJ1  
TRGC2  
TRGC1  
TRAV6

-DEGs AND ImmPort
